# Supplementary material for: Generation of dipeptidyl peptidase IV (DPP-IV) inhibitory peptides during the enzymatic hydrolysis of tropical banded cricket (Gryllodes sigillatus) proteins
Source: Royal Society of Chemistry journal article supplement (doi:10.1039/c7fo01568b), 2017-11-27

**Supplementary Figure S1.** Sodium dodecyl sulphate polyacrylamide gel electrophoresis (SDS-PAGE) in reducing conditions for of the cricket powder (CP), the freeze-dried cricket protein isolate (CPI) and 5 CPI hydrolysates (H1-H5) generated within the design of experiments (DOE).

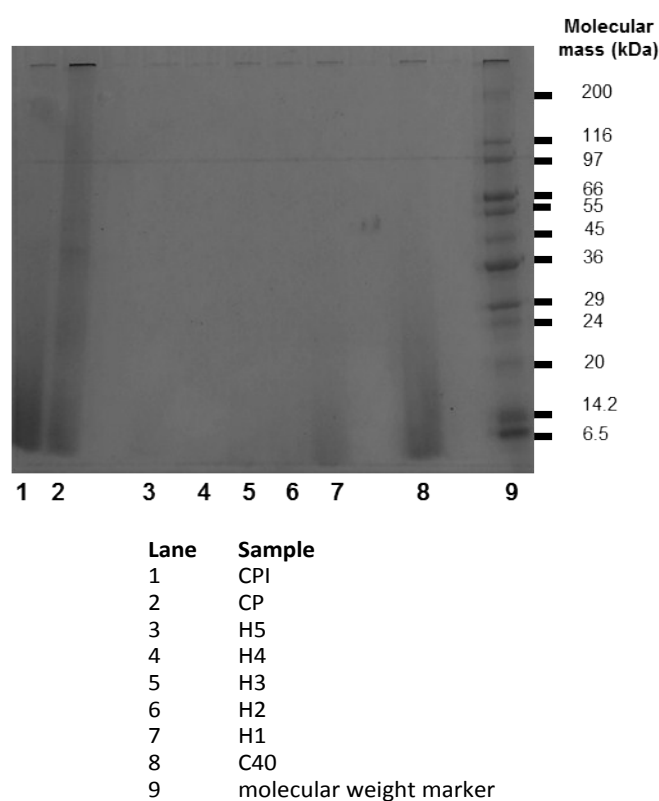

Supplement: c7fo01568b1.pdf [file c7fo01568b1.pdf]
